# Supplementary material
Source: publisher figshare collection journal article supplement (https://tandf.figshare.com/ndownloader/files/17337809)
Supplement: Supplementary file 1 [file 17337809]

Supplementary Table 8. Effects of bentonite addition and *A*. *sessilis* cultivation on residual PCBi concentrations (ng g-1) in the soil containing 1200 ng ƩPCBi g-1 after 26 weeks of incubation.

| PCBi | without plant cultivation | | | with alternanthra cultivation | | |
| --- | --- | --- | --- | --- | --- | --- |
| **B0*(Control)** | **B2** | **B4** | **B0** | **B2** | **B4** |
| CB5 | 10.55 a | 10.73 a | 10.72 a | 8.51 b | 6.61 c | 5.42 c |
| CB18 | 14.64 a | 14.28 a | 13.60 a | 10.61 b | 9.02 b | 5.75 c |
| CB31 | 29.85 a | 29.31 a | 29.68 a | 22.29 b | 19.25 b | 16.52 c |
| CB44 | 18.84 a | 18.85 a | 19.02 a | 15.25 b | 14.11 b | 8.48 c |
| CB52 | 7.44 a | 7.25 a | 7.42 a | 6.26 b | 4.29 c | 3.41c |
| CB66 | 33.99 a | 35.09 a | 35.40 a | 32.07 a | 25.93 b | 18.96 c |
| CB87 | 112.42 a | 115.69 a | 114.05 a | 86.21 b | 75.43 c | 51.72 d |
| CB101 | 16.00 a | 15.61 a | 16.27 a | 11.84 b | 9.16 c | 4.76 d |
| CB110 | 61.01 a | 59.29 a | 57.93 a | 45.36 b | 38.64 c | 28.78 d |
| CB138 | 53.03 a | 51.44 a | 52.47 a | 35.62 b | 29.51 c | 19.83 d |
| CB141 | 196.56 a | 207.27 a | 207.39 a | 209.99 a | 192.61 b | 151.47 c |
| CB151 | 39.78 a | 39.98 a | 41.76 a | 25.39 b | 19.49 c | 14.41 d |
| CB153 | 52.49 a | 45.63 a | 51.62 a | 46.57 b | 33.41 c | 28.49 d |
| CB170 | 56.94 a | 55.92 a | 53.19 a | 37.11 b | 25.16 c | 21.05 c |
| CB180 | 31.67 a | 32.33 a | 32.44 a | 31.65 a | 25.04 b | 19.45 c |
| CB183 | 136.41 a | 137.47 a | 139.26 a | 120.89 b | 112.95 c | 83.62 d |
| CB187 | 73.37 a | 69.73 a | 72.55 a | 60.68 b | 47.93 c | 41.36 c |

Different letters in each row represent signiﬁcant differences with Tukey test (P< 0.05).

*: B0: 0% bentonite, B2: 2% bentonite, B4: 4% bentonite
